# Supplementary material for: Competition of intermolecular interactions in the self-assembly of co-crystals of trifluoro-meta-arylenediamines (benzene, nitrobenzene, pyridine) with 12-, 15-, and 18-membered crown ethers
Source: Royal Society of Chemistry journal article supplement (doi:10.1039/d4ce00612g), 2024-01-01
Supplement: d4ce00612g1.pdf [file d4ce00612g1.pdf]

*Electronic Supplementary Information*

Competition of intermolecular interactions in the self-assembly of co-crystals of trifluoro-*meta*-arylenediamines (benzene, nitrobenzene, pyridine) with 12-, 15-, 18-membered crown ethers

Tamara Vaganova,<sup>\*a</sup> Yuriy Gatilov,<sup>a</sup> Natalia Kryuchkova,<sup>b</sup>  
Denis Pishchur,<sup>b</sup> and Evgenij Malykhin<sup>a</sup>

---

<sup>a</sup> N.N. Vorozhtsov Novosibirsk Institute of Organic Chemistry, Siberian Branch of the Russian Academy of Sciences, 9 Lavrentiev Avenue, 630090 Novosibirsk, Russian Federation. E-mail: [vaganova@nioch.nsc.ru](mailto:vaganova@nioch.nsc.ru)

<sup>b</sup> Nikolaev Institute of Inorganic Chemistry, Siberian Branch of the Russian Academy of Sciences, 3 Lavrentiev Avenue, 630090 Novosibirsk, Russian Federation.

**Table S1** Crystallographic data and structure refinement parameters

Experiments were carried out at 296 K with Mo K $\alpha$  radiation using a Bruker APEX-II CCD.

|                                                                            | <b>A•15cr5</b>                                                                                              | <b>B•15cr5</b>                                                                                              | <b>2C•15cr5</b>                                                                                                               |
|----------------------------------------------------------------------------|-------------------------------------------------------------------------------------------------------------|-------------------------------------------------------------------------------------------------------------|-------------------------------------------------------------------------------------------------------------------------------|
| Crystal data                                                               |                                                                                                             |                                                                                                             |                                                                                                                               |
| Chemical formula                                                           | C <sub>6</sub> H <sub>5</sub> N <sub>2</sub> F <sub>3</sub> ·C <sub>10</sub> H <sub>20</sub> O <sub>5</sub> | C <sub>5</sub> H <sub>4</sub> F <sub>3</sub> N <sub>3</sub> ·C <sub>10</sub> H <sub>20</sub> O <sub>5</sub> | 2(C <sub>6</sub> H <sub>4</sub> F <sub>3</sub> N <sub>3</sub> O <sub>2</sub> )·C <sub>10</sub> H <sub>20</sub> O <sub>5</sub> |
| $M_r$                                                                      | 382.38                                                                                                      | 383.37                                                                                                      | 634.50                                                                                                                        |
| Crystal system, space group                                                | Monoclinic, <i>C2/c</i>                                                                                     | Monoclinic, <i>C2/c</i>                                                                                     | Triclinic, <i>P</i> <sup>-</sup> 1                                                                                            |
| $a, b, c$ (Å)                                                              | 24.457 (5), 8.6861 (17), 18.097 (3)                                                                         | 24.7949 (15), 8.4611 (4), 17.9811 (10)                                                                      | 11.5203 (14), 11.5359 (15), 11.8617 (17)                                                                                      |
| $\alpha, \beta, \gamma$ (°)                                                | 90, 90.435 (9), 90                                                                                          | 90, 91.929 (3), 90                                                                                          | 106.975 (5), 108.550 (4), 90.001 (5)                                                                                          |
| $V$ (Å <sup>3</sup> )                                                      | 3844.3 (13)                                                                                                 | 3770.2 (4)                                                                                                  | 1421.9 (3)                                                                                                                    |
| $Z$                                                                        | 8                                                                                                           | 8                                                                                                           | 2                                                                                                                             |
| $\mu$ (mm <sup>-1</sup> )                                                  | 0.12                                                                                                        | 0.12                                                                                                        | 0.14                                                                                                                          |
| Crystal size (mm)                                                          | 0.67 × 0.17 × 0.06                                                                                          | 0.62 × 0.38 × 0.02                                                                                          | 0.67 × 0.11 × 0.07                                                                                                            |
| Data collection                                                            |                                                                                                             |                                                                                                             |                                                                                                                               |
| Absorption correction                                                      | Multi-scan<br><i>SADABS2016/2</i>                                                                           | Multi-scan<br><i>SADABS2008/1</i>                                                                           | Multi-scan<br><i>SADABS2016/2</i>                                                                                             |
| $T_{\min}, T_{\max}$                                                       | 0.815, 0.971                                                                                                | 0.951, 0.991                                                                                                | 0.915, 0.971                                                                                                                  |
| No. of measured, independent and observed [ $I > 2\sigma(I)$ ] reflections | 13107, 3382, 2440                                                                                           | 32775, 3496, 2349                                                                                           | 14729, 5290, 3401                                                                                                             |
| $R_{\text{int}}$                                                           | 0.055                                                                                                       | 0.054                                                                                                       | 0.047                                                                                                                         |
| $(\sin \theta/\lambda)_{\text{max}}$ (Å <sup>-1</sup> )                    | 0.597                                                                                                       | 0.605                                                                                                       | 0.608                                                                                                                         |
| Refinement                                                                 |                                                                                                             |                                                                                                             |                                                                                                                               |
| $R[F^2 > 2\sigma(F^2)], wR(F^2), S$                                        | 0.095, 0.250, 1.07                                                                                          | 0.075, 0.217, 1.08                                                                                          | 0.064, 0.201, 1.03                                                                                                            |
| No. of reflections                                                         | 3382                                                                                                        | 3496                                                                                                        | 5290                                                                                                                          |
| No. of parameters                                                          | 262                                                                                                         | 259                                                                                                         | 398                                                                                                                           |
| No. of restraints                                                          | 56                                                                                                          | 30                                                                                                          | 4                                                                                                                             |
| H-atom treatment                                                           | H-atom parameters constrained                                                                               | H-atom parameters constrained                                                                               | H-atom parameters constrained                                                                                                 |
| $\Delta_{\text{max}}, \Delta_{\text{min}}$ (e Å <sup>-3</sup> )            | 0.33, -0.23                                                                                                 | 0.73, -0.46                                                                                                 | 0.49, -0.37                                                                                                                   |

**Table S1** Crystallographic data and structure refinement parameters (continued)

|                                                                                                                | <b>2B•12cr4</b>                                                                                               | <b>2C•12cr4</b>                                                                                                              |
|----------------------------------------------------------------------------------------------------------------|---------------------------------------------------------------------------------------------------------------|------------------------------------------------------------------------------------------------------------------------------|
| Crystal data                                                                                                   |                                                                                                               |                                                                                                                              |
| Chemical formula                                                                                               | 2(C <sub>5</sub> H <sub>4</sub> F <sub>3</sub> N <sub>3</sub> )•C <sub>8</sub> H <sub>16</sub> O <sub>4</sub> | 2(C <sub>6</sub> H <sub>4</sub> F <sub>3</sub> N <sub>3</sub> O <sub>2</sub> )•C <sub>8</sub> H <sub>16</sub> O <sub>4</sub> |
| <i>M<sub>r</sub></i>                                                                                           | 502.43                                                                                                        | 590.45                                                                                                                       |
| Crystal system, space group                                                                                    | Triclinic, <i>P</i> <sup>-</sup> 1                                                                            | Monoclinic, <i>P</i> 2 <sub>1</sub> / <i>c</i>                                                                               |
| <i>a</i> , <i>b</i> , <i>c</i> (Å)                                                                             | 5.7104 (2), 9.5020 (4), 10.2481 (5)                                                                           | 15.4617 (18), 21.673 (3), 7.3234 (8)                                                                                         |
| α, β, γ (°)                                                                                                    | 88.963 (2), 87.032 (2), 81.176 (2)                                                                            | 90, 90.584 (5), 90                                                                                                           |
| <i>V</i> (Å <sup>3</sup> )                                                                                     | 548.72 (4)                                                                                                    | 2454.0 (5)                                                                                                                   |
| <i>Z</i>                                                                                                       | 1                                                                                                             | 4                                                                                                                            |
| μ (mm <sup>-1</sup> )                                                                                          | 0.14                                                                                                          | 0.15                                                                                                                         |
| Crystal size (mm)                                                                                              | 0.41 × 0.25 × 0.21                                                                                            | 0.65 × 0.18 × 0.08                                                                                                           |
| Data collection                                                                                                |                                                                                                               |                                                                                                                              |
| Absorption correction                                                                                          | Multi-scan<br><i>SADABS2008/1</i>                                                                             | Multi-scan<br><i>SADABS2016/2</i>                                                                                            |
| <i>T<sub>min</sub></i> , <i>T<sub>max</sub></i>                                                                | 0.932, 0.970                                                                                                  | 0.803, 0.958                                                                                                                 |
| No. of measured, independent and observed [ <i>I</i> > 2σ( <i>I</i> )] reflections                             | 19664, 2944, 2344                                                                                             | 43266, 4876, 2325                                                                                                            |
| <i>R<sub>int</sub></i>                                                                                         | 0.034                                                                                                         | 0.056                                                                                                                        |
| (sin θ/λ) <sub>max</sub> (Å <sup>-1</sup> )                                                                    | 0.686                                                                                                         | 0.622                                                                                                                        |
| Refinement                                                                                                     |                                                                                                               |                                                                                                                              |
| <i>R</i> [ <i>F</i> <sup>2</sup> > 2σ( <i>F</i> <sup>2</sup> )], <i>wR</i> ( <i>F</i> <sup>2</sup> ), <i>S</i> | 0.035, 0.108, 1.06                                                                                            | 0.140, 0.447, 1.36                                                                                                           |
| No. of reflections                                                                                             | 2944                                                                                                          | 4876                                                                                                                         |
| No. of parameters                                                                                              | 171                                                                                                           | 361                                                                                                                          |
| No. of restraints                                                                                              | 0                                                                                                             | 0                                                                                                                            |
| H-atom treatment                                                                                               | H atoms treated by a mixture of independent and constrained refinement                                        | H-atom parameters constrained                                                                                                |
| Δ <sub>max</sub> , Δ <sub>min</sub> (e Å <sup>-3</sup> )                                                       | 0.24, -0.20                                                                                                   | 0.91, -0.45                                                                                                                  |

Computer programs: Bruker *APEX2*, Bruker *SAINT*, *SHELXT* 2014/5 (Sheldrick, 2014), *SHELXS97* (Sheldrick 2008), *SHELXL2018/3* (Sheldrick, 2018), Bruker *SHELXTL*.

**Table S2** Hydrogen bonding in the co-crystals

| Crystal                                 | Interaction<br>D-H...A | $l_{D-H}$ (Å) | $l_{H...A}$ (Å) | $l_{D...A}$ (Å) | Angle<br>D-H...A (deg) | Symmetry code for<br>acceptor |
|-----------------------------------------|------------------------|---------------|-----------------|-----------------|------------------------|-------------------------------|
| <b>A·15cr5</b> <sup>a</sup>             | N(1)-H(1A)...O(2A)     | 0.86          | 2.30            | 3.131(7)        | 164                    |                               |
|                                         | N(1)-H(1B)...O(5)      | 0.86          | 2.26            | 3.033(7)        | 149                    |                               |
|                                         | N(2)-H(2A)...O(1)      | 0.86          | 2.27            | 2.976(8)        | 140                    | x,-y,-1/2+z                   |
|                                         | N(2)-H(2B)...O(4)      | 0.86          | 2.15            | 2.982(7)        | 163                    | x,-y,-1/2+z                   |
|                                         | C(13)-H(13A)...F(2A)   | 0.97          | 2.43            | 3.276(11)       | 145                    | x,-1+y,z                      |
| <b>B·15cr5</b> <sup>a</sup>             | N(2)-H(2A)...O(4)      | 0.86          | 2.20            | 3.035(4)        | 162                    | x,y,1+z                       |
|                                         | N(2)-H(2B)...O(1)      | 0.86          | 2.32            | 3.046(4)        | 142                    | x,y,1+z                       |
|                                         | N(3)-H(3A)...O(5)      | 0.86          | 2.22            | 2.987(4)        | 148                    | x,1-y,1/2+z                   |
|                                         | N(3)-H(3B)...O(2)      | 0.86          | 2.12            | 2.964(4)        | 167                    | x,1-y,1/2+z                   |
| <b>C<sub>2</sub>·15cr5</b> <sup>a</sup> | N(2)-H(2A)...O(3)      | 0.86          | 2.52            | 3.375(5)        | 173                    | 1+x,y,z                       |
|                                         | N(2)-H(2A)...O(4)      | 0.86          | 2.50            | 3.187(4)        | 137                    | 1+x,y,z                       |
|                                         | N(3)-H(3A)...O(9)      | 0.86          | 2.17            | 2.977(4)        | 156                    | 2-x,1-y,1-z                   |
|                                         | N(3)-H(3B)...O(6)      | 0.86          | 2.16            | 2.953(4)        | 154                    | 2-x,1-y,1-z                   |
|                                         | N(5)-H(5A)...O(2)      | 0.86          | 2.58            | 3.443(5)        | 178                    | x, y, z                       |
|                                         | N(6)-H(6A)...O(7)      | 0.86          | 2.20            | 2.976(5)        | 150                    | x, y, z                       |
|                                         | N(6)-H(6A)...O(8)      | 0.86          | 2.47            | 3.108(8)        | 132                    | x, y, z                       |
|                                         | N(6)-H(6B)...O(5)      | 0.86          | 2.11            | 2.900(4)        | 153                    | x, y, z                       |
| C(22)-H(22A)...O(2)                     | 0.97                   | 2.59          | 3.550(5)        | 153             | x, 1+y, z              |                               |
| <b>B<sub>2</sub>·12cr4</b>              | N(2)-H(1)...N(1)       | 0.905(17)     | 2.206(17)       | 3.1112(16)      | 179.2(19)              | -x,-y,2-z                     |
|                                         | N(2)-H(2)...O(2)       | 0.812(17)     | 2.280(17)       | 3.0602(15)      | 161.3(16)              | x,y,1+z                       |
|                                         | N(3)-H(3)...F(1)       | 0.847(17)     | 2.342(17)       | 3.1324(14)      | 155.4(16)              | 1-x,1-y,2-z                   |
|                                         | N(3)-H(4)...O(1)       | 0.854(17)     | 2.194(17)       | 3.0389(15)      | 170.1(14)              | 1+x,y,z                       |
| <b>C<sub>2</sub>·12cr4</b>              | N(2)-H(2A)...O(6)      | 0.86          | 2.08            | 2.912(9)        | 163                    | 1-x,1-y,1-z                   |
|                                         | N(3)-H(3A)...O(8)      | 0.86          | 2.15            | 2.983(9)        | 164                    | 1+x,3/2-y,-1/2+z              |
|                                         | N(3)-H(3B)...O(3)      | 0.86          | 2.47            | 3.063(11)       | 127                    | 1+x,y,z                       |
|                                         | N(5)-H(5A)...O(7)      | 0.86          | 2.12            | 2.930(9)        | 156                    | -x,2-y,1-z                    |
|                                         | N(6)-H(6A)...O(5)      | 0.86          | 2.26            | 3.063(9)        | 155                    | x,3/2-y,1/2+z                 |
|                                         | N(6)-H(6B)...O(1)      | 0.86          | 2.49            | 3.088(10)       | 128                    | x, y, z                       |
|                                         | C(14)-H(14A)...O(2)    | 0.97          | 2.38            | 3.345(12)       | 171                    | 1-x,-1/2+y,1/2-z              |
|                                         | C(14)-H(14B)...F(4)    | 0.97          | 2.48            | 3.452(11)       | 177                    | x,3/2-y,-1/2+z                |

<sup>a</sup> H-bonds are specified for major parts of co-formers.

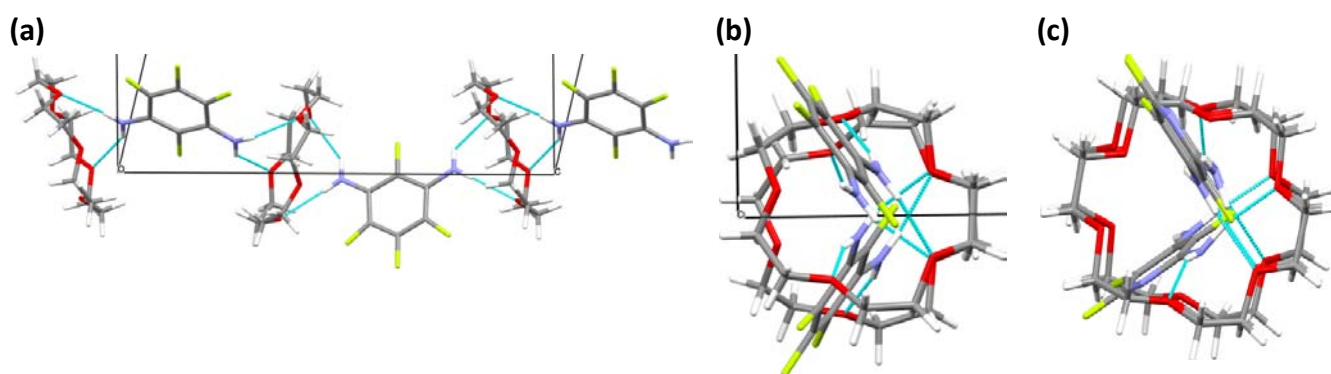

**Fig. S1** 1D assembly in the co-crystals: **A·15cr5**, top and cross-section view (a, b), **B·18cr6** (c).

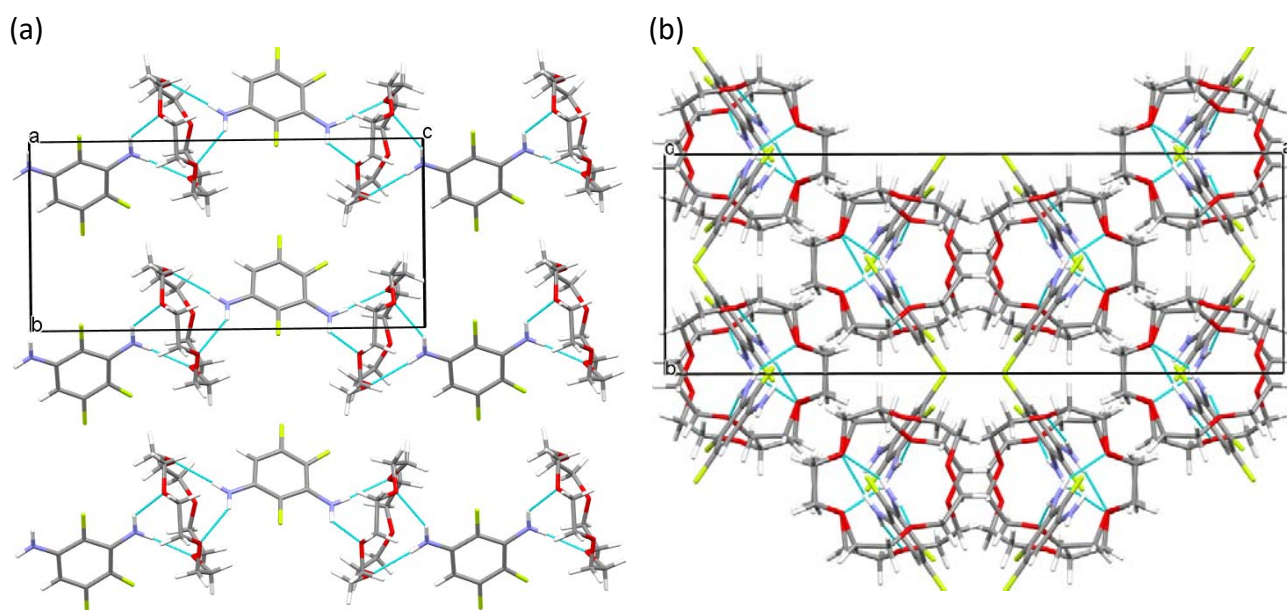

**Fig. S2** Packing of the rods in **A·15cr5**, top view on the layer (a) and cross-section view (b).

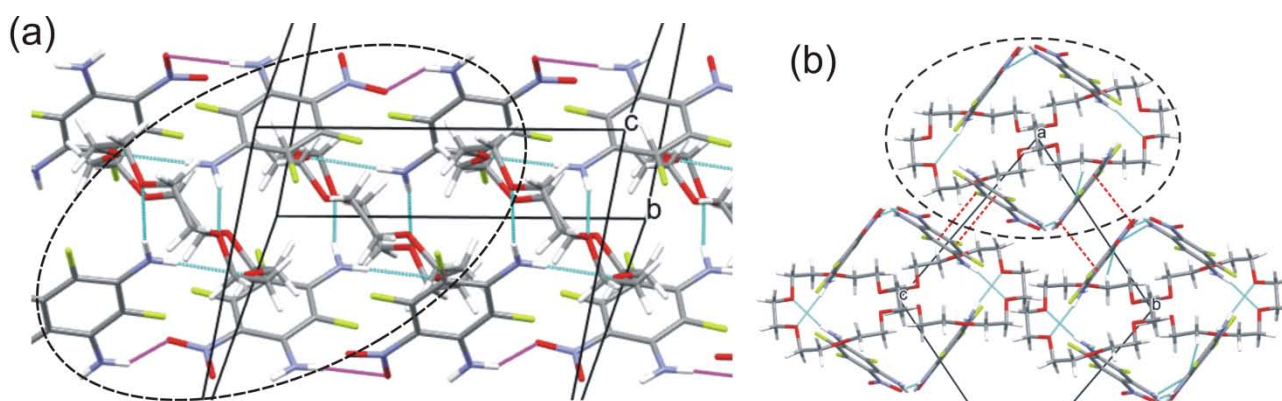

**Fig. S3** Molecular packing in **C<sub>2</sub>·18cr6**: H-bonded 1D assembly (a), N–H...O<sub>cr</sub> (turquoise), N–H...O<sub>nitro</sub> (magenta), unit (6 molecules) is framed; p...π interactions between assemblies (b).

anti-parallel displaced geometry

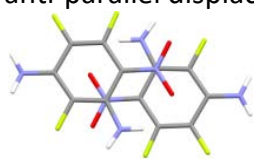

**C<sub>2</sub>·18cr6** (N-O... $\pi$ )

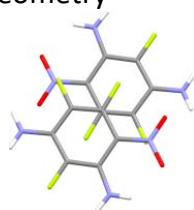

**C<sub>2</sub>·18cr6** (C-F... $\pi$ )

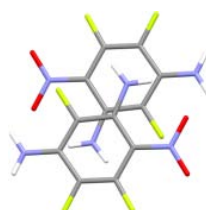

**C<sub>2</sub>·15cr5** (H-N... $\pi$ )

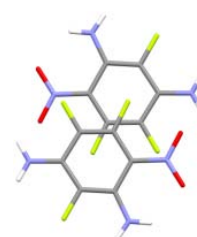

**C<sub>2</sub>·15cr5** (C-F... $\pi$ )

anti-parallel displaced geometry

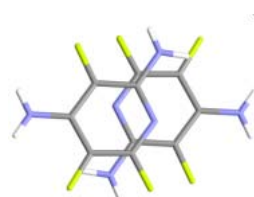

**B<sub>2</sub>·12cr4**( $\pi$ ... $\pi$ )

rotated geometry

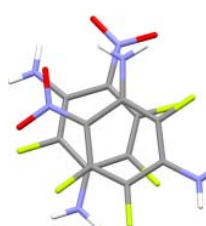

**C<sub>2</sub>·12cr4** ( $\pi$ ... $\pi$ + C-F... $\pi$ )

**Fig. S4** Overlap of stacked molecules in the co-crystals; intermolecular interactions are shown in brackets.

(a)

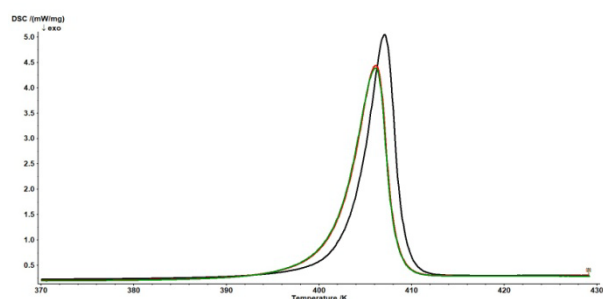

(b)

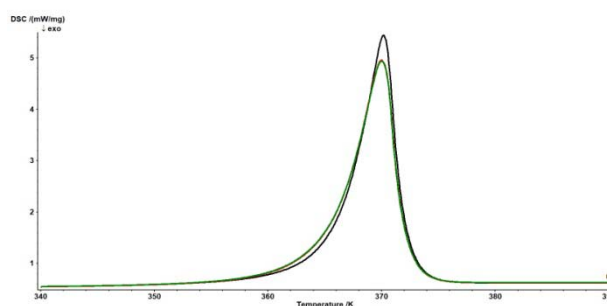

**Fig. S5** DSC curves of the co-crystals, the first (black) second (red) and third (green) heating runs: **C<sub>2</sub>·12cr4** (a); **B·15cr5** (b).

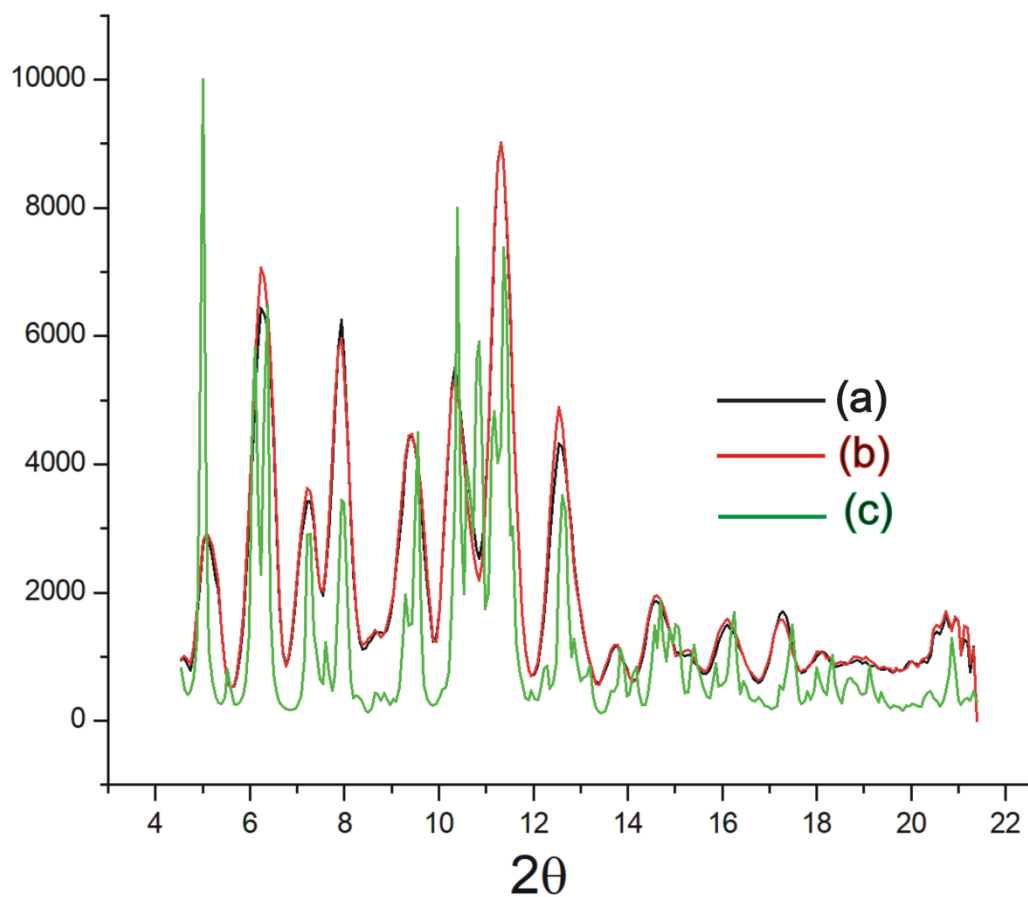

**Fig. S6** PXRd patterns of  $C_2 \cdot 15cr5$ : bulky precipitate crystallized from  $CCl_4 + EtOAc$  (experimental, a), crystallized from the melt (experimental, b), simulated from SC-XRD data using MERCURY software with peak shape 0.1 (calculated, c).

**Table S3** Enthalpies of co-crystals and isolated molecules. Level of theory: DFT/GGA-PBE/ USPP in QUANTUM ESPRESSO

| Code                       | Final enthalpy (Ry) | Z | $H/Z$ (Ry) <sup>a</sup> | $H(Y_x \cdot cr_{1-x})$ <sup>b</sup> (Ry) |
|----------------------------|---------------------|---|-------------------------|-------------------------------------------|
| 1:1 co-crystals            |                     |   |                         |                                           |
| <b>A·18cr6</b>             | -4965,43964502      | 8 | -620,67995563           | -310,33997782                             |
| <b>A·15cr5</b>             | -4485,73906150      | 6 | -560,71738269           | -280,35869134                             |
| <b>B·18cr6</b>             | -2512,69165561      | 4 | -628,17291390           | -314,08645695                             |
| <b>B·15cr5</b>             | -4545,68850232      | 8 | -568,21106279           | -284,10553139                             |
| <b>C·18cr6</b>             | -1407,99039845      | 2 | -703,99519922           | -351,99759961                             |
| 2:1 co-crystals            |                     |   |                         |                                           |
| <b>B<sub>2</sub>·12cr4</b> | -1553,31183037      | 2 | -776,65591518           | -258,88530506                             |
| <b>C<sub>2</sub>·18cr6</b> | -2096,52758610      | 2 | -1048,26379305          | -349,42126435                             |
| <b>C<sub>2</sub>·15cr5</b> | -1976,58304405      | 2 | -988,29152202           | -329,43050734                             |
| <b>C<sub>2</sub>·12cr4</b> | -3713,32172365      | 4 | -928,33043091           | -309,44347697                             |
| Isolated molecules         |                     |   |                         |                                           |
| <b>A</b>                   | -260,89699642       |   |                         |                                           |
| <b>B</b>                   | -268,38552210       |   |                         |                                           |
| <b>C</b>                   | -344,21390406       |   |                         |                                           |
| <b>18cr6</b>               | -359,73061909       |   |                         |                                           |
| <b>15cr5</b>               | -299,76689594       |   |                         |                                           |
| <b>12cr4</b>               | -239,80588767       |   |                         |                                           |

<sup>a</sup> Z is the number of molecules in a cell.

<sup>b</sup>  $H(Y_x \cdot cr_{1-x})$  is the enthalpy of a co-crystal normalized per unit, where Y – diamine, x – molar fraction of the diamine in the co-crystal (1/2 in 1:1 co-crystals and 2/3 in 2:1 co-crystals).



**Table S4** Energies of individual molecules, H-bonded and p/ $\pi$ -dimers in co-crystals.<sup>a</sup> Level of theory: DFT/B3LYP/ M6-31G (TM)+\*

| Crystal                    | Molecule/dimer                                     | $E$ (Ha)      | $E$ (kJ mol <sup>-1</sup> ) |
|----------------------------|----------------------------------------------------|---------------|-----------------------------|
| <b>1:1 co-crystals</b>     |                                                    |               |                             |
| <b>A·18cr6</b>             | A                                                  | -640,5123432  | -1681216,798                |
|                            | cr                                                 | -922,6781681  | -2421845,656                |
|                            | A...cr ( <i>ortho</i> -N-H...O <sub>cr</sub> )     | -1563,2047691 | -4103099,878                |
|                            | A...cr ( <i>para</i> -N-H...O <sub>cr</sub> )      | -1563,2037276 | -4103097,144                |
| <b>A·15cr5</b>             | A                                                  | -640,6850241  | -1681670,051                |
|                            | cr                                                 | -769,1717646  | -2018922,048                |
|                            | A...cr ( <i>ortho</i> -N-H...O <sub>cr</sub> )     | -1409,8719318 | -3700631,847                |
|                            | A...cr ( <i>para</i> -N-H...O <sub>cr</sub> )      | -1409,8702896 | -3700627,536                |
| <b>B·18cr6</b>             | B                                                  | -656,7396075  | -1723810,122                |
|                            | cr                                                 | -923,0121607  | -2422722,319                |
|                            | B...cr ( <i>ortho</i> -N-H...O <sub>cr</sub> )     | -1579,7690408 | -4146577,778                |
|                            | B...cr ( <i>para</i> -N-H...O <sub>cr</sub> )      | -1579,7698471 | -4146579,895                |
| <b>B·15cr5</b>             | B                                                  | -656,7396832  | -1723810,320                |
|                            | cr                                                 | -769,1722317  | -2018923,274                |
|                            | B...cr ( <i>ortho</i> -N-H...O <sub>cr</sub> )     | -1425,9267614 | -3742772,563                |
|                            | B...cr ( <i>para</i> -N-H...O <sub>cr</sub> )      | -1425,9282050 | -3742776,352                |
| <b>2:1 co-crystals</b>     |                                                    |               |                             |
| <b>B<sub>2</sub>·12cr4</b> | B                                                  | -656,7390695  | -1723808,710                |
|                            | cr                                                 | -615,3344728  | -1615129,924                |
|                            | B...cr ( <i>ortho</i> -N-H...O <sub>cr</sub> )     | -1272,0786491 | -3338952,038                |
|                            | B...cr ( <i>para</i> -N-H...O <sub>cr</sub> )      | -1272,0826359 | -3338962,503                |
|                            | B...B ( <i>ortho</i> -N-H...N <sub>het</sub> )     | -1313,4959830 | -3447664,256                |
|                            | B...B ( <i>para</i> -N-H...F)                      | -1313,4804502 | -3447623,486                |
|                            | B...B ( $\pi$ ... $\pi$ )                          | -1313,4787514 | -3447622,027                |
| <b>C<sub>2</sub>·15cr5</b> | C1                                                 | -845,1848614  | -2218441,224                |
|                            | C2                                                 | -845,1851088  | -2218441,874                |
|                            | cr                                                 | -769,1711753  | -2018920,501                |
|                            | C1...cr ( <i>para</i> -N-H...O <sub>cr</sub> )     | -1614,3766912 | -4237415,939                |
|                            | C2...cr ( <i>para</i> -N-H...O <sub>cr</sub> )     | -1614,3746599 | -4237410,607                |
|                            | C1...C2 ( <i>ortho</i> -N-H...O <sub>nitro</sub> ) | -1690,3765745 | -4436900,433                |
|                            | C2...C1 ( <i>ortho</i> -N-H...O <sub>nitro</sub> ) | -1690,3761675 | -4436899,364                |
|                            | C1...C1 (H-N... $\pi$ )                            | -1690,3710327 | -4436885,887                |
|                            | C2...C2 (C-F... $\pi$ )                            | -1690,3746415 | -4436895,359                |
| <b>C<sub>2</sub>·12cr4</b> | C1                                                 | -845,1844941  | -2218440,260                |
|                            | C2                                                 | -845,1845671  | -2218440,452                |
|                            | cr1                                                | -615,3343722  | -1615129,660                |
|                            | cr2                                                | -615,3351076  | -1615131,590                |
|                            | C1...cr2 ( <i>ortho</i> -N-H...O <sub>cr</sub> )   | -1460,5272960 | -3833592,046                |
|                            | C1...cr1 ( <i>para</i> -N-H...O <sub>cr</sub> )    | -1460,5280302 | -3833593,974                |
|                            | C2...cr1 ( <i>ortho</i> -N-H...O <sub>cr</sub> )   | -1460,5270929 | -3833591,513                |

|  |                                                   |               |              |
|--|---------------------------------------------------|---------------|--------------|
|  | C2...cr2 ( <i>para</i> -N-H...O <sub>cr</sub> )   | -1460,5269036 | -3833591,017 |
|  | C1...C2 ( <i>para</i> -N-H...O <sub>nitro</sub> ) | -1690,3805087 | -4436910,759 |
|  | C2...C1 ( <i>para</i> -N-H...O <sub>nitro</sub> ) | -1690,3806095 | -4436911,024 |
|  | C1...C1 ( $\pi\cdots\pi$ )                        | -1690,3708164 | -4436885,319 |
|  | C2...C2 ( $\pi\cdots\pi$ )                        | -1690,3712521 | -4436886,463 |

<sup>a</sup> Intermolecular interaction energies  $\Delta E$  (Table 6) were calculated by subtracting the energy of the two molecules from the dimer energy.

**Table S5** ESP atomic charges for atoms of polyfluorinated arylenediamines in the gas phase ( $q$ , in units of elementary charge). The structures show the atom numbering scheme. Level of theory: DFT/B3LYP/ M6-31G (TM)+\*.

| Code             | A                                                                                 | B                                                                                 | C                                                                                  |
|------------------|-----------------------------------------------------------------------------------|-----------------------------------------------------------------------------------|------------------------------------------------------------------------------------|
| Numbering scheme | 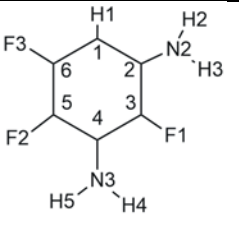 |  |  |
| $q(C1)$          | -0,411                                                                            |                                                                                   | -0,216                                                                             |
| $q(C2)$          | 0,207                                                                             | 0,443                                                                             | 0,127                                                                              |
| $q(C3)$          | 0,080                                                                             | -0,076                                                                            | 0,101                                                                              |
| $q(C4)$          | 0,077                                                                             | 0,216                                                                             | 0,101                                                                              |
| $q(C5)$          | 0,097                                                                             | -0,061                                                                            | 0,113                                                                              |
| $q(C6)$          | 0,169                                                                             | 0,429                                                                             | 0,105                                                                              |
| $q(N1)$          |                                                                                   | -0,529                                                                            | 0,776                                                                              |
| $q(N2)$          | -0,720                                                                            | -0,734                                                                            | -0,677                                                                             |
| $q(N3)$          | -0,686                                                                            | -0,688                                                                            | -0,682                                                                             |
| $q(O1)$          |                                                                                   |                                                                                   | -0,398                                                                             |
| $q(O2)$          |                                                                                   |                                                                                   | -0,479                                                                             |
| $q(F1)$          | -0,119                                                                            | -0,103                                                                            | -0,117                                                                             |
| $q(F2)$          | -0,127                                                                            | -0,113                                                                            | -0,123                                                                             |
| $q(F3)$          | -0,132                                                                            | -0,162                                                                            | -0,080                                                                             |
| $q(H1)$          | 0,223                                                                             |                                                                                   |                                                                                    |
| $q(H2)$          | 0,342                                                                             | 0,355                                                                             | 0,397                                                                              |
| $q(H3)$          | 0,326                                                                             | 0,330                                                                             | 0,340                                                                              |
| $q(H4)$          | 0,332                                                                             | 0,342                                                                             | 0,350                                                                              |
| $q(H5)$          | 0,343                                                                             | 0,351                                                                             | 0,361                                                                              |

**Table S6.** Comparison of QTAIM topological parameters at BCPs at intermolecular bonds for dimers in diaminopyridine A co-crystals: electron density ( $\rho$ ), Laplacian of the electron density ( $\nabla^2\rho$ ),  $G(r)$  - kinetic energy,  $V(r)$  –potential energy,  $E$ - total energy (in a.u).

| System                                                | $\rho$ | $\nabla^2\rho$ | $G(r)$ | $V(r)$ | $E$   | $ V(r) /G(r)$ | $E/\rho$ |
|-------------------------------------------------------|--------|----------------|--------|--------|-------|---------------|----------|
| <b>B<sub>2</sub>·12cr4_ortho-N-H...O<sub>cr</sub></b> |        |                |        |        |       |               |          |
| O(cr4)...H2(NH2)                                      | 0,024  | 0,079          | 0,019  | -0,018 | 0,001 | 0,960         | 0,031    |
| <b>B<sub>2</sub>·12cr4_para-N-H...O<sub>cr</sub></b>  |        |                |        |        |       |               |          |
| O(cr4)...H(NH2)                                       | 0,022  | 0,075          | 0,017  | -0,016 | 0,001 | 0,915         | 0,068    |
| F1(C)...H1(cr)                                        | 0,006  | 0,031          | 0,006  | -0,004 | 0,002 | 0,672         | 0,280    |
| F1(C1)...H2(cr)                                       | 0,006  | 0,025          | 0,005  | -0,003 | 0,002 | 0,664         | 0,280    |
| <b>B·15cr5_ortho-N-H...O<sub>cr</sub></b>             |        |                |        |        |       |               |          |
| N...H(crCH2)                                          | 0,004  | 0,014          | 0,003  | -0,002 | 0,001 | 0,672         | 0,209    |
| N(NH2)...H(C1H2 cr)                                   | 0,005  | 0,019          | 0,004  | -0,005 | 0,001 | 1,295         | 0,213    |
| H(NH2)...O1(cr5)                                      | 0,015  | 0,060          | 0,013  | -0,011 | 0,002 | 0,825         | 0,144    |
| H(NH2)...O2(cr5)                                      | 0,021  | 0,074          | 0,017  | -0,015 | 0,002 | 0,904         | 0,078    |
| N(NH2)...H(C2H2 cr)                                   | 0,005  | 0,021          | 0,004  | -0,003 | 0,001 | 0,677         | 0,238    |
| H(NH2)...O3(cr5)                                      | 0,007  | 0,026          | 0,005  | -0,003 | 0,002 | 0,698         | 0,229    |
| <b>B·15cr5_para-N-H...O<sub>cr</sub></b>              |        |                |        |        |       |               |          |
| N(NH2)...H(C1H2 cr)                                   | 0,007  | 0,022          | 0,004  | -0,003 | 0,001 | 0,752         | 0,155    |
| H(NH2)...O1(cr5)                                      | 0,028  | 0,094          | 0,023  | -0,023 | 0,001 | 0,986         | 0,012    |
| H(NH2)...O2(cr5)                                      | 0,024  | 0,083          | 0,019  | -0,018 | 0,001 | 0,926         | 0,061    |
| F...H(C2H2 cr)                                        | 0,003  | 0,013          | 0,002  | -0,001 | 0,001 | 0,630         | 0,267    |
| <b>B·18cr6_ortho-N-H...O<sub>cr</sub></b>             |        |                |        |        |       |               |          |
| N...H(crC1)                                           | 0,006  | 0,021          | 0,004  | -0,003 | 0,001 | 0,730         | 0,173    |
| N...H(crC2)                                           | 0,007  | 0,022          | 0,004  | -0,003 | 0,001 | 0,736         | 0,172    |
| F...H(C1 cr)                                          | 0,002  | 0,010          | 0,002  | -0,001 | 0,001 | 0,605         | 0,293    |
| F...H(C2 cr)                                          | 0,005  | 0,021          | 0,004  | -0,003 | 0,001 | 0,661         | 0,263    |
| N(N1H2)...H(C1H2 cr)                                  | 0,004  | 0,018          | 0,003  | -0,002 | 0,001 | 0,656         | 0,260    |
| N(N1H2)...H(C2H2 cr)                                  | 0,004  | 0,017          | 0,003  | -0,002 | 0,001 | 0,645         | 0,271    |
| H1(N1H2)...O1( cr6)                                   | 0,019  | 0,070          | 0,016  | -0,014 | 0,002 | 0,871         | 0,106    |
| N1(N1H2)...O2cr6)                                     | 0,005  | 0,024          | 0,004  | -0,003 | 0,001 | 0,659         | 0,282    |
| H2(N1H2)...O3(cr6)                                    | 0,016  | 0,062          | 0,013  | -0,011 | 0,002 | 0,839         | 0,131    |
| <b>B·18cr6_para-N-H...O<sub>cr</sub></b>              |        |                |        |        |       |               |          |
| F1...H(C1 cr)                                         | 0,005  | 0,022          | 0,004  | -0,003 | 0,001 | 0,660         | 0,272    |
| F1...H(C2 cr)                                         | 0,008  | 0,036          | 0,007  | -0,005 | 0,002 | 0,690         | 0,275    |
| F2...H(C1 cr)                                         | 0,005  | 0,020          | 0,004  | -0,002 | 0,002 | 0,648         | 0,281    |
| F2...H(C2 cr)                                         | 0,005  | 0,019          | 0,004  | -0,002 | 0,002 | 0,660         | 0,257    |
| N(N1H2)...O1(cr6)                                     | 0,003  | 0,010          | 0,002  | -0,001 | 0,001 | 0,634         | 0,236    |
| N(N1H2)...O2(cr6)                                     | 0,004  | 0,016          | 0,003  | -0,002 | 0,001 | 0,661         | 0,237    |
| N(N1H2)...O3( cr6)                                    | 0,006  | 0,024          | 0,005  | -0,003 | 0,002 | 0,683         | 0,244    |
| H1(N1H2)...O4(cr6)                                    | 0,023  | 0,082          | 0,019  | -0,018 | 0,001 | 0,929         | 0,058    |
| H2(N1H2)...O5(cr6)                                    | 0,010  | 0,041          | 0,008  | -0,006 | 0,002 | 0,754         | 0,197    |

|                                                                  |       |       |       |        |        |       |        |
|------------------------------------------------------------------|-------|-------|-------|--------|--------|-------|--------|
|                                                                  |       |       |       |        |        |       |        |
| <b>B<sub>2</sub>·12cr4_</b> <i>para</i> -N-H···F                 |       |       |       |        |        |       |        |
| F1...H2                                                          | 0,011 | 0,055 | 0,011 | -0,008 | 0,003  | 0,727 | 0,261  |
| F2...H1                                                          | 0,011 | 0,055 | 0,011 | -0,008 | 0,003  | 0,727 | 0,261  |
| F1...F2                                                          | 0,005 | 0,024 | 0,004 | -0,003 | 0,002  | 0,637 | 0,329  |
|                                                                  |       |       |       |        |        |       |        |
| <b>B<sub>2</sub>·12cr4_</b> <i>ortho</i> -N-H···N <sub>het</sub> |       |       |       |        |        |       |        |
| N1...H2(NH2)                                                     | 0,027 | 0,073 | 0,019 | -0,020 | -0,001 | 1,042 | -0,030 |
| H1(NH2)...N2                                                     | 0,027 | 0,073 | 0,019 | -0,020 | -0,001 | 1,042 | -0,030 |
